# Supplementary material
Source: HighWire-hosted journal article supplement (https://jnis.bmj.com/content/11/10/964)
Supplement: inline-supplementary-material-1 [file inline-supplementary-material-1.docx]

**SUPPLEMENTAL MATERIAL**

**Supplemental Appendix**

Supplemental Figure 1. Study flowchart

Supplemental Figure 2. Distribution of modified Rankin Scale scores in entire cohort (EVT versus No EVT)

Supplemental Figure 3. Distribution of modified Rankin Scale scores in propensity score-matched cohort (EVT versus No EVT)

**Supplemental Figure 1. Study flowchart**

**
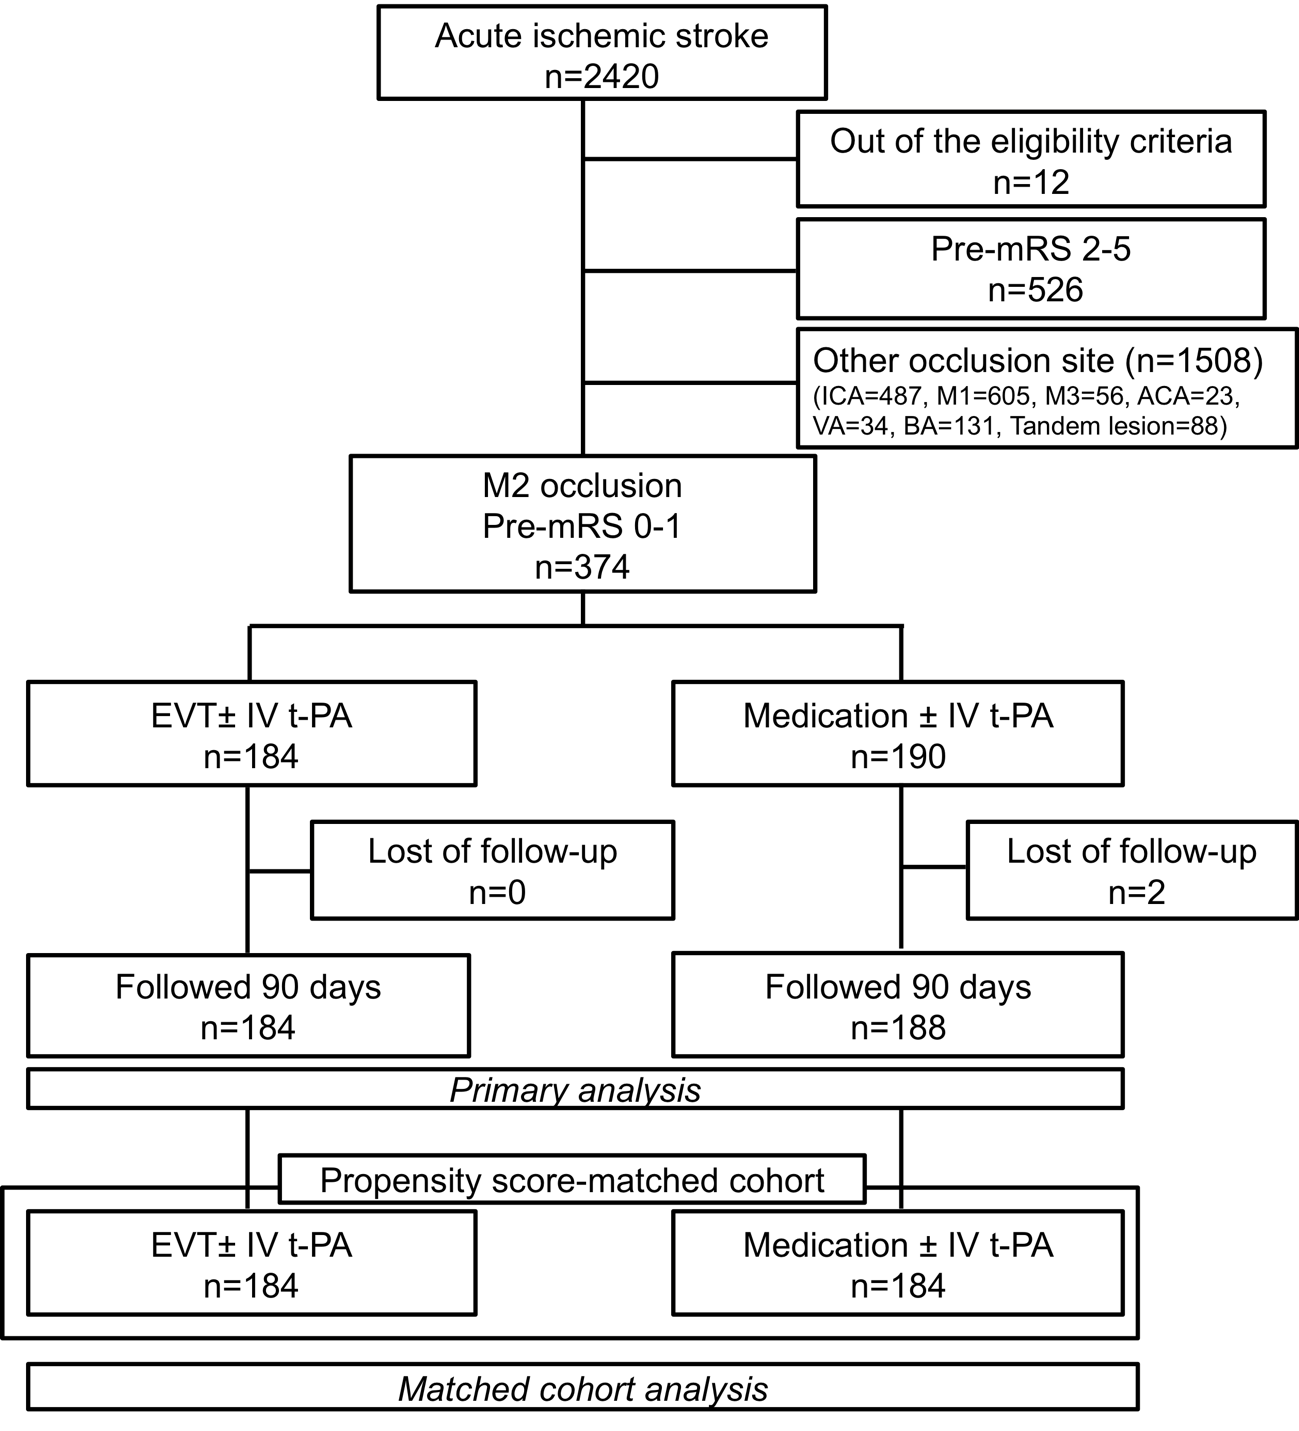
**

Pre-mRS, modified Rankin Scale before stroke onset; M1, M1 segment of the middle cerebral artery; M2, M2 segment of the middle cerebral artery; M3, M3 segment of the middle cerebral artery; ACA, anterior cerebral artery; VA, vertebral artery; BA, basilar artery; EVT, endovascular therapy; IV t-PA, intravenous tissue plasminogen activator.

**Supplemental Figure 2. Distribution of modified Rankin Scale scores in entire cohort (EVT versus No EVT)**

EVT, Endovascular Therapy.

**Supplemental Figure 3. Distribution of modified Rankin Scale scores in propensity score-matched cohort (EVT versus No EVT)**

EVT, endovascular therapy.
